# Supplementary material for: Nomogram model for predicting the risk of post-stroke depression based on clinical characteristics and DNA methylation
Source: PeerJ. 2023 Oct 12;11:e16240. doi: 10.7717/peerj.16240 (PMC10576964; doi:10.7717/peerj.16240)
Supplement: Supplemental Information 2 [file peerj-11-16240-s002.xlsx]

## Sheet: Sheet1
id	cg02550950	cg03329597	cg13557709	cg25290307
1001	1	1	1	1
1002	1	1	1	0
1003	1	1	1	1
1004	1	0	1	0
1005	1	2	1	0
1006	1	0	0	1
1007	1	0	0	1
1008	0	1	1	1
1009	1	1	0	0
1010	1	0	0	1
1011	0	0	1	1
1012	1	0	1	1
1013	1	1	0	0
1014	1	2	1	1
1015	1	2	1	1
1016	1	0	1	1
1017	0	1	1	0
1018	1	0	1	0
1019	1	0	1	0
1020	1	0	1	1
1021	1	0	1	1
1022	1	0	0	0
1023	1	0	1	1
1024	0	0	1	0
1025	1	1	1	0
1026	2	0	0	1
1027	2	0	1	1
1028	1	0	1	1
1029	1	0	1	1
1030	1	0	0	1
1031	1	1	1	1
1032	2	0	0	1
1033	1	0	1	1
1034	1	2	1	1
1035	0	1	1	1
1036	1	0	1	0
1037	1	1	1	1
1038	0	0	1	1
1039	1	1	0	0
1040	1	0	0	1
1041	1	0	1	1
1042	1	0	1	1
1043	1	1	1	1
1044	1	0	1	1
1045	2	1	0	0
1046	0	0	1	1
1047	0	0	1	1
1048	1	0	1	1
1049	1	0	1	0
1050	1	1	1	1
1051	1	1	0	1
1052	2	1	1	1
1053	2	1	1	1
1054	1	2	0	1
1055	0	1	1	0
1056	1	0	1	1
1057	1	0	1	1
1058	1	0	1	1
1059	1	1	1	1
1060	1	0	1	0
1061	0	1	0	1
1062	2	1	1	1
1063	2	1	1	1
1064	1	1	1	1
1065	2	1	1	1
1066	0	2	1	1
1067	0	2	1	1
1068	1	0	0	1
1069	1	0	1	0
1070	2	0	0	0
1071	1	0	1	1
1072	1	0	0	1
1073	1	2	1	1
1074	0	0	1	1
1075	2	0	1	1
1076	1	0	1	1
1077	1	1	0	1
1078	2	2	1	0
1079	0	0	1	0
1080	0	0	1	0
1081	0	0	1	0
1082	0	2	1	0
1083	1	0	1	1
1084	2	0	1	1
1085	1	0	1	1
1086	1	1	1	0
1087	2	1	1	0
1088	1	1	1	1
1089	0	1	1	1
1090	1	0	1	0
1091	0	1	1	0
1092	1	1	1	1
1093	0	2	1	0
1094	0	0	0	1
1095	1	1	0	1
1096	1	1	1	1
1097	1	0	1	1
1098	2	1	1	1
1099	1	0	1	1
1100	2	0	0	1
1101	1	0	0	1
1102	1	1	0	0
1103	2	0	1	0
1104	2	0	0	0
1105	1	0	1	0
1106	1	1	1	0
1107	1	1	1	0
1108	0	0	1	1
1109	0	1	0	0
1110	0	1	1	1
1111	0	0	1	1
1112	0	0	0	1
1113	0	0	1	1
1114	2	1	0	0
1115	2	0	1	0
1116	1	0	1	0
1117	1	0	1	1
1118	1	1	1	1
1119	2	1	0	0
1120	1	0	0	1
1121	2	0	0	1
1122	2	1	0	1
1123	1	0	0	1
1124	2	1	1	0
1125	2	1	1	1
1126	2	0	1	1
1127	2	1	0	0
1128	1	0	1	1
1129	1	0	1	1
1130	1	1	1	0
1131	1	1	1	1
1132	2	1	1	0
1133	2	0	1	1
1134	2	1	1	1
1135	1	0	0	1
1136	1	1	1	1
1137	1	1	1	1
1138	1	0	0	1
1139	1	0	1	1
1140	1	0	1	1
1141	2	0	1	0
1142	2	1	0	1
1143	2	1	1	0
1144	2	0	0	1
1145	2	0	0	1
1146	1	2	1	1
1147	2	2	0	1
1148	1	1	1	1
1149	1	1	1	1
1150	0	1	1	1
1151	1	2	1	1
1152	1	0	1	1
1153	2	0	1	1
1154	1	0	1	1
1155	1	1	1	1
1156	2	1	1	1
1157	1	1	1	0
1158	1	0	0	1
1159	1	1	1	1
1160	2	1	1	0
1161	1	0	0	0
1162	1	0	1	1
1163	2	0	1	1
1164	1	2	1	1
1165	1	0	1	1
1166	1	1	1	0
1167	1	1	1	0
1168	1	2	1	1
1169	1	1	1	1
1170	2	0	1	1
1171	2	1	1	1
1172	2	2	1	1
1173	2	2	0	1
1174	1	1	1	0
1175	2	0	1	1
1176	1	0	0	1
1177	1	0	1	1
1178	1	0	1	1
1179	1	1	1	1
1180	2	0	1	0
1181	1	0	0	1
1182	1	1	0	1
1183	1	1	1	1
1184	2	1	0	1
1185	2	0	1	1
1186	1	0	1	0
1187	1	0	0	1
1188	1	0	1	1
1189	2	1	1	1
1190	1	0	0	0
1191	1	0	1	1
1192	1	1	1	1
1193	1	0	1	0
1194	2	1	1	1
1195	1	0	1	1
1196	1	0	0	1
1197	1	1	0	1
1198	1	0	1	1
1199	1	2	1	1
1200	1	1	1	1
1201	1	0	1	1
1202	1	0	1	0
1203	1	2	1	1
1204	1	1	0	0
1205	1	0	1	1
1206	1	0	1	1
1207	1	1	1	1
1208	1	0	1	1
1209	1	0	1	1
1210	1	1	1	1
1211	1	1	1	0
1212	1	0	1	1
1213	2	1	1	0
1214	2	0	1	1
1215	2	0	1	1
1216	2	2	1	1
1217	1	2	1	0
1218	1	0	1	1
1219	1	1	1	1
1220	1	1	1	1
1221	1	0	1	1
1222	1	1	0	1
1223	1	1	0	1
1224	2	1	1	1
1225	1	2	0	1
1226	0	0	1	0

## Sheet: Sheet3
	Gene	AZZ	BSH	CBP	CDA	CDP	CFY	CGF	CGS	CHENY	CJL	CLA	CSY	CWL	CXR	CXZ	CY	CYA	CYR	CZH	CZQ	DCL	DTX	DXG	DYQ	DZW	DZX	FDZ	FKW	FMH	FW	GJ	GTY	GYQ	GZ	HF	HJB	HL	HLS	HQL	HSS	HUANGXH	HW	HWP	HXH	HXQ	HYA	HYH	HYN
	cg02550950	0.448389	0.637988	0.526961	0.757763	0.782014	0.312487	0.828118	0.40906	0.645945	0.62009	0.232224	0.566966	0.811589	0.56726	0.532531	0.584093	0.569589	0.612023	0.665146	0.784968	0.826452	0.836977	0.504306	0.502191	0.552941	0.2855	0.577085	0.740294	0.386526	0.395568	0.561521	0.305319	0.379788	0.280963	0.296894	0.306697	0.349811	0.473035	0.335797	0.57979	0.233418	0.247437	0.352957	0.666725	0.277729	0.542708	0.514564	0.367936
	cg03329597	0.0855107	0.506449	0.973344	0.969429	0.569362	0.530958	0.0600748	0.0644436	0.0720298	0.533562	0.0496924	0.526706	0.0500533	0.536758	0.094293	0.552109	0.0676068	0.969217	0.532756	0.522373	0.557995	0.509636	0.0310158	0.523415	0.0566877	0.0677759	0.0619651	0.543661	0.532038	0.530168	0.0498091	0.0414756	0.531041	0.526847	0.0693441	0.0616171	0.072607	0.51893	0.965665	0.0531464	0.0624765	0.0583668	0.536091	0.531869	0.0515235	0.0488852	0.0511437	0.059048
	cg13557709	0.404163	0.548969	0.512947	0.515561	0.613009	0.339005	0.143391	0.429679	0.129233	0.422355	0.60208	0.321848	0.623625	0.477365	0.33679	0.150028	0.314065	0.156509	0.624359	0.112168	0.302203	0.325335	0.367653	0.564018	0.341943	0.325369	0.584968	0.303902	0.313599	0.621861	0.340169	0.476748	0.586718	0.365135	0.57415	0.345408	0.350352	0.494319	0.371208	0.354317	0.35882	0.358234	0.330857	0.14497	0.357628	0.425742	0.142181	0.561014
	cg14260773	0.752975		0.916667	0.814815	0.884826	0.849143	0.884615	0.747486	0.84375	0.928571	0.75	0.84651	0.886907	0.734966	0.869575	0.877515	0.863636	0.769955	0.879852	0.808226	0.824442	0.906484	0.88349	0.861111	0.820063	0.811777	0.766667	0.742021	0.824324	0.771739			0.879247	0.797872	0.865535	0.805833	0.769231	0.76716	0.948718	0.853778	0.95628	0.903288	0.885135	0.84022	0.890621	0.841417	0.776099	0.847826
	cg18843803	0.953976	0.960451	0.962127	0.938688	0.959097	0.957448	0.965804	0.946999	0.959261	0.949926	0.969357	0.961712	0.96869	0.950274	0.965695	0.968392	0.961045	0.953579	0.968845	0.96104	0.967492	0.971619	0.967062	0.964927	0.962657	0.959649	0.973029	0.952672	0.96049	0.970815	0.964807	0.969382	0.96657	0.960428	0.968109	0.95663	0.963366	0.949745	0.96547	0.962366	0.959834	0.976	0.946723	0.959076	0.969246	0.96157	0.954917	0.964729
	cg25290307	0.383033	0.385061	0.356831	0.329327	0.400216	0.342619	0.354129	0.375524	0.281775	0.455759	0.234952	0.480372	0.332093	0.378955	0.238234	0.400495	0.440898	0.476924	0.433335	0.408921	0.370705	0.243904	0.361985	0.359826	0.353941	0.469439	0.379167	0.294288	0.369991	0.257781	0.360996	0.424734	0.338819	0.392159	0.320815	0.313169	0.362711	0.25629	0.504704	0.457446	0.376014	0.249888	0.340525	0.262174	0.261488	0.347979	0.412887	0.371835
	Gene	cg02550950	cg03329597	cg13557709	cg14260773	cg18843803	cg25290307
PT	PT	0.211538	0.769231	0.625865	0.833333	0.926667	0.472727
CLA	CLA	0.232224	0.0496924	0.60208	0.75	0.969357	0.234952
HUANGXH	HUANGXH	0.233418	0.0624765	0.35882	0.95628	0.959834	0.376014
ZHUSE	ZHUSE	0.236314	0.506792	0.369117		0.969489	0.335711				CFY	0.312487	0.530958	0.339005	0.849143	0.957448	0.342619
LJS	LJS	0.241247	0.0443248	0.354927	0.8125	0.953222	0.352102				DCL	0.826452	0.557995	0.302203	0.824442	0.967492	0.370705
SCB	SCB	0.244427	0.0423371	0.41271	0.816092	0.967792	0.446422				HSS	0.57979	0.0531464	0.354317	0.853778	0.962366	0.457446
HW	HW	0.247437	0.0583668	0.358234	0.903288	0.976	0.249888				LEL	0.529577	0.547586	0.518722	0.885225	0.964917	0.378638
WJE	WJE	0.252167	0.526265	0.317714	0.737179	0.956611	0.285377				LHX	0.670306	0.96057	0.287272	0.8	0.951729	0.218067
LZC	LZC	0.252965	0.967077	0.547367	0.823529	0.953232	0.373224				LJP	0.410936	0.544895	0.522359	0.88526	0.962173	0.268489
SCY	SCY	0.261656	0.063208	0.543865	0.75	0.965915	0.365019				LKY	0.311857	0.0565613	0.541652	0.880558	0.965643	0.258945
LWJ	LWJ	0.264205	0.040162	0.516258	0.858146	0.969897	0.44637				LSX	0.315394	0.0392518	0.139596	0.892857	0.957772	0.526658
LZJ	LZJ	0.265785	0.976674	0.406279	0.920478	0.977217	0.295282				LZQ	0.584695	0.0489274	0.592723		0.965505	0.260702
WB	WB	0.2676	0.181994	0.421712	0.941176	0.997043	0.430328				PBL	0.320119	0.0431082	0.418948	0.766667	0.979365	0.3871
SDX	SDX	0.268958	0.54622	0.523078	0.872807	0.963877	0.413708				QXC	0.5811	0.0629203	0.460851	0.77381	0.96058	0.374027
PJC	PJC	0.269292	0.0526122	0.580684	0.870415	0.965034	0.260915				TCH	0.33208	0.0622164	0.494222	0.82243	0.957762	0.459795
SYF	SYF	0.277165	0.560386	0.574311	0.892332	0.971529	0.35156				WCJ	0.696127	0.0650415	0.463266		0.958808	0.452326
WSQ	WSQ	0.277666	0.0534893	0.461255	0.785353	0.955071	0.474921				WYM	0.591634	0.971085	0.522798	0.870656	0.95765	0.480507
HXQ	HXQ	0.277729	0.0515235	0.357628	0.890621	0.969246	0.261488				XZF	0.624299	0.0626217	0.444917	0.732543	0.958075	0.308418
YYP	YYP	0.278457	0.521167	0.560484	0.839194	0.959116	0.291441				YFH	0.565858	0.550889	0.0934826	0.749695	0.941641	0.427681
GZ	GZ	0.280963	0.526847	0.365135	0.797872	0.960428	0.392159				YZP	0.453404	0.551373	0.386378	0.821429	0.967735	0.238581
LYF	LYF	0.281096	0.0544204	0.525671	0.8652	0.965809	0.374171				ZFM	0.658417	0.52854	0.635372	0.913974	0.976451	0.336285
DZX	DZX	0.2855	0.0677759	0.325369	0.811777	0.959649	0.469439				ZH	0.562913	0.0326879	0.571685	0.819536	0.972098	0.352006
YXH	YXH	0.285603	0.53961	0.419569	0.901321	0.966987	0.331669				ZOUHS	0.570827	0.975163	0.368508		0.950885	0.385664
LXZ	LXZ	0.288367	0.525429	0.572843	0.851892	0.961293	0.468221
XXJ	XXJ	0.292176	0.0526524	0.376903	0.861111	0.965871	0.380087
YZR	YZR	0.292803	0.553192	0.349285	0.884615	0.95204	0.333441
LXY	LXY	0.292965	0.0464151	0.396978	0.84272	0.972045	0.256061
WUXW	WUXW	0.292968	0.0679357	0.158706	0.790323	0.952573	0.47937
HF	HF	0.296894	0.0693441	0.57415	0.865535	0.968109	0.320815
LH	LH	0.298705	0.529313	0.534735	0.893428	0.965068	0.400191
ZMX	ZMX	0.30231	0.958126	0.338436	0.834269	0.961489	0.257032
ZXJ	ZXJ	0.304521	0.532114	0.337164	0.868421	0.966261	0.351815
GTY	GTY	0.305319	0.0414756	0.476748		0.969382	0.424734
LW	LW	0.305519	0.0739682	0.565252	0.783582	0.973329	0.465001
JYJ	JYJ	0.305555	0.0483738	0.29186	0.85	0.9634	0.375138
HJB	HJB	0.306697	0.0616171	0.345408	0.805833	0.95663	0.313169
LHR	LHR	0.307489	0.0546704	0.480891	0.844097	0.96389	0.342301
XX	XX	0.311447	0.0517058	0.34999	0.931818	0.962647	0.384202
ZLM	ZLM	0.312604	0.578867	0.397878	0.823622	0.958637	0.287562
ZYE	ZYE	0.312797	0.550746	0.258982	0.730855	0.948919	0.338302
LAL	LAL	0.31487	0.530328	0.291281	0.826923	0.964136	0.305897
YUANXH	YUANXH	0.322668	0.534735	0.379654	0.857143	0.958127	0.275305
SY	SY	0.331899	0.063103	0.296364	0.853267	0.969071	0.335425
LZH	LZH	0.332048	0.0359591	0.608395	0.872354	0.968877	0.36208
WXW	WXW	0.334653	0.0610016	0.572873	0.858298	0.9635	0.421353
WLY	WLY	0.335747	0.0598756	0.322011	0.877092	0.963669	0.355882
HQL	HQL	0.335797	0.965665	0.371208	0.948718	0.96547	0.504704
ZN	ZN	0.338818	0.0410401	0.59307	0.889216	0.968793	0.414981
ZJY	ZJY	0.338828	0.0493155	0.592532	0.87094	0.96513	0.245516
JYL	JYL	0.339826	0.96796	0.53109	0.807692	0.960247	0.389998
SLG	SLG	0.346068	0.0531542	0.395683	0.861918	0.961492	0.285424
YHP	YHP	0.346953	0.0622893	0.317363	0.861111	0.963379	0.44395
WXC	WXC	0.34698	0.570005	0.402493	0.873939	0.962609	0.307054
WSF	WSF	0.34721	0.536763	0.320681	0.747808	0.953626	0.417704
LGH	LGH	0.348307	0.972499	0.507154		0.961074	0.439117
XUHJ	XUHJ	0.349608	0.527149	0.626705	0.857143	0.970273	0.481191
HL	HL	0.349811	0.072607	0.350352	0.769231	0.963366	0.362711
XHB	XHB	0.350176	0.0550306	0.284188	0.802159	0.956653	0.340636
LXM	LXM	0.352083	0.0893403	0.457805	0.958333	0.956994	0.37432
HWP	HWP	0.352957	0.536091	0.330857	0.885135	0.946723	0.340525
PJM	PJM	0.3539	0.529551	0.365439	0.81969	0.95713	0.292648
LZE	LZE	0.354144	0.518105	0.511126	0.861064	0.965759	0.454933
ZZ	ZZ	0.354322	0.0857747	0.546305	0.858108	0.974069	0.240695
ZZH	ZZH	0.354979	0.0418191	0.383152	0.90091	0.968242	0.268721
LIQD	LIQD	0.356519	0.54377	0.422086	0.687464	0.938582	0.38404
LM	LM	0.358068	0.526144	0.44068	0.822704	0.962129	0.387886
LSJ	LSJ	0.358925	0.0381076	0.160298	0.903846	0.964946	0.442148
LWN	LWN	0.360479	0.964021	0.507401	0.958333	0.961646	0.347781
YYT	YYT	0.361468	0.0505376	0.551242	0.830108	0.96668	0.229979
LYC	LYC	0.366998	0.524826	0.575456	0.9375	0.971711	0.303286
WSD	WSD	0.367479	0.500858	0.458143	0.719478	0.953424	0.36938
XSN	XSN	0.367885	0.966669	0.547819	0.868421	0.966544	0.405113
SHH	SHH	0.367921	0.530298	0.163321	0.887244	0.969925	0.316593
HYN	HYN	0.367936	0.059048	0.561014	0.847826	0.964729	0.371835
LX	LX	0.369273	0.0675748	0.360181	0.954545	0.953515	0.338324
XWL	XWL	0.369338	0.526793	0.529682	0.923804	0.974743	0.374633
XGH	XGH	0.370359	0.960246	0.120047	0.712108	0.935385	0.393618
XGW	XGW	0.371385	0.540344	0.0963236	0.864714	0.965055	0.311398
TML	TML	0.373299	0.0626629	0.445874	0.75266	0.950849	0.303097
TP	TP	0.374353	0.0618327	0.151825	0.870242	0.968559	0.304934
ZJL	ZJL	0.376816	0.0320586	0.402534	0.75	0.973125	0.487549
GYQ	GYQ	0.379788	0.531041	0.586718	0.879247	0.96657	0.338819
LHQ	LHQ	0.380429	0.530848	0.546283	0.666667	0.962935	0.329627
WJ	WJ	0.382398	0.961914	0.445636	0.758478	0.955798	0.473865
WHB	WHB	0.384246	0.529441	0.161311	0.892489	0.965944	0.244888
TCM	TCM	0.38439	0.0401387	0.382045	0.8125	0.96788	0.416026
LXN	LXN	0.38459	0.0468345	0.370451	0.897152	0.970351	0.264724
FMH	FMH	0.386526	0.532038	0.313599	0.824324	0.96049	0.369991
LIXZ	LIXZ	0.386894	0.0402792	0.55127	0.96	0.967297	0.356138
YZW	YZW	0.392491	0.56982	0.562859		0.964497	0.427617
THW	THW	0.392981	0.0586272	0.572231	0.852896	0.964728	0.468781
LLH	LLH	0.394877	0.02622	0.160216	0.933794	0.972091	0.412286
FW	FW	0.395568	0.530168	0.621861	0.771739	0.970815	0.257781
LCJ	LCJ	0.39794	0.963616	0.379888	0.857209	0.965769	0.491314
ZAD	ZAD	0.400322	0.0343853	0.417578	0.851852	0.97308	0.350765
LQL	LQL	0.404065	0.530905	0.359226	0.851516	0.962223	0.248413
TSY	TSY	0.405035	0.0626464	0.527581	0.837222	0.963862	0.266428
LWP	LWP	0.40572	0.54563	0.307491	0.865945	0.963916	0.404571
LCB	LCB	0.407821	0.536211	0.480429	0.826923	0.967112	0.355462
CGS	CGS	0.40906	0.0644436	0.429679	0.747486	0.946999	0.375524
ZSX	ZSX	0.413112	0.0437968	0.582434	0.905197	0.970112	0.43188
WANGJ	WANGJ	0.415612	0.0748448	0.110108	0.892405	0.951026	0.262854
JXW	JXW	0.415772	0.0567128	0.629509	0.88232	0.974635	0.418381
RGP	RGP	0.424207	0.962531	0.341221	0.83459	0.96334	0.363631
PQY	PQY	0.42658	0.961059	0.46182	0.892857	0.959824	0.408501
PDZ	PDZ	0.426665	0.0468531	0.35475	0.858033	0.965969	0.344459
AZZ	AZZ	0.448389	0.0855107	0.404163	0.752975	0.953976	0.383033
ZGL	ZGL	0.448657	0.0684296	0.530887	0.869565	0.95925	0.363227
WLJ	WLJ	0.463454	0.538471	0.46029	0.863636	0.960943	0.530846
HLS	HLS	0.473035	0.51893	0.494319	0.76716	0.949745	0.25629
XMX	XMX	0.48294	0.525977	0.600698	0.878049	0.962115	0.44276
ZPJ	ZPJ	0.491411	0.0411693	0.587358	0.775	0.964751	0.45051
ZY	ZY	0.493974	0.53959	0.3194	0.857143	0.964742	0.305026
DYQ	DYQ	0.502191	0.523415	0.564018	0.861111	0.964927	0.359826
ZJC	ZJC	0.503447	0.063461	0.13153	0.805432	0.957298	0.378335
DXG	DXG	0.504306	0.0310158	0.367653	0.88349	0.967062	0.361985
TAH	TAH	0.514321	0.951773	0.418313	0.867424	0.969559	0.306126
HYH	HYH	0.514564	0.0511437	0.142181	0.776099	0.954917	0.412887
XHF	XHF	0.516475	0.527301	0.351997	0.707317	0.969538	0.429868
LCX	LCX	0.516821	0.976677	0.366821	0.877072	0.964653	0.269811
XYE	XYE	0.517443	0.0632598	0.324396	0.832324	0.957155	0.510319
ZSE	ZSE	0.522214	0.0753401	0.421653	0.789474	0.945125	0.403957
WXM	WXM	0.523013	0.0479305	0.170185	0.82516	0.959863	0.265337
ZCZ	ZCZ	0.524441	0.538024	0.252671	0.80337	0.948131	0.261103
LJJ	LJJ	0.524727	0.542955	0.516652	0.833333	0.966376	0.385061
CBP	CBP	0.526961	0.973344	0.512947	0.916667	0.962127	0.356831
ZHC	ZHC	0.527087	0.507793	0.522924	0.875	0.958764	0.377345
ZLN	ZLN	0.528007	0.540702	0.52201	0.75	0.938727	0.494386
LRR	LRR	0.530118	0.0385597	0.487026	0.793621	0.949376	0.335241
ZHS	ZHS	0.530794	0.0458067	0.343053	0.838176	0.967095	0.301807
CXZ	CXZ	0.532531	0.094293	0.33679	0.869575	0.965695	0.238234
HYA	HYA	0.542708	0.0488852	0.425742	0.841417	0.96157	0.347979
LYE	LYE	0.545604	0.0497196	0.34205	0.862327	0.966529	0.337869
LJ	LJ	0.546615	0.0488372	0.496307	1	0.962039	0.505249
LIXY	LIXY	0.550023	0.0509808	0.575568	0.751519	0.96538	0.339269
LGJ	LGJ	0.550147	0.0508685	0.341824	0.875	0.965645	0.47383
ZCQ	ZCQ	0.551263	0.0684979	0.307192	0.793656	0.959071	0.510451
JBS	JBS	0.551312	0.0322596	0.610771	0.896647	0.959795	0.447453
DZW	DZW	0.552941	0.0566877	0.341943	0.820063	0.962657	0.353941
SZY	SZY	0.554521	0.0525516	0.356861	0.785714	0.959079	0.286742
LYY	LYY	0.561276	0.519351	0.307279	0.87428	0.959917	0.37016
GJ	GJ	0.561521	0.0498091	0.340169		0.964807	0.360996
QQB	QQB	0.562008	0.555511	0.475179	0.909091	0.955676	0.4575
ZKH	ZKH	0.564415	0.541987	0.523922	0.862876	0.965222	0.37931
LCF	LCF	0.565555	0.0426883	0.342849	0.847826	0.966437	0.396012
LXP	LXP	0.56585	0.959794	0.340938	0.860008	0.966726	0.369457
PD	PD	0.566822	0.0453736	0.368799		0.974921	0.368428
CSY	CSY	0.566966	0.526706	0.321848	0.84651	0.961712	0.480372
CXR	CXR	0.56726	0.536758	0.477365	0.734966	0.950274	0.378955
LQY	LQY	0.568197	0.03628	0.276042	0.892459	0.969859	0.47608
JDS	JDS	0.568632	0.043577	0.314984	0.76087	0.923296	0.343074
YDP	YDP	0.568752	0.0381986	0.607229	0.746212	0.968432	0.330926
ZMS	ZMS	0.569433	0.0646191	0.432657	0.875	0.958481	0.514569
CYA	CYA	0.569589	0.0676068	0.314065	0.863636	0.961045	0.440898
QZX	QZX	0.573561	0.606135	0.391234	0.874749	0.959074	0.352645
ZYF	ZYF	0.574151	0.0271345	0.631846	0.821429	0.970703	0.338465
XHJ	XHJ	0.57502	0.0982257	0.423913	0.905552	0.968867	0.378146
ZLZ	ZLZ	0.576151	0.530134	0.567144	0.884426	0.969614	0.400843
ZWG	ZWG	0.576728	0.560862	0.308701	0.88	0.944868	0.49894
FDZ	FDZ	0.577085	0.0619651	0.584968	0.766667	0.973029	0.379167
LJL	LJL	0.57742	0.545417	0.574079	0.888889	0.965987	0.417985
ZQY	ZQY	0.580185	0.0691389	0.335178	0.792362	0.960316	0.304409
QFL	QFL	0.582204	0.0931119	0.211336	0.7	0.931963	0.45761
CY	CY	0.584093	0.552109	0.150028	0.877515	0.968392	0.400495
TLB	TLB	0.585208	0.0549807	0.531673	0.878505	0.96745	0.376329
WWD	WWD	0.585468	0.0324769	0.419403	0.885481	0.972416	0.426291
XBH	XBH	0.586823	0.961666	0.584105	0.889305	0.962143	0.34917
MLH	MLH	0.586877	0.531967	0.619192	0.791667	0.967098	0.266022
WZZ	WZZ	0.590295	0.063032	0.330731	0.849754	0.967866	0.299538
ZXM	ZXM	0.592679	0.0423862	0.358255	0.886534	0.967586	0.422451
YZX	YZX	0.593603	0.0675748	0.506907	0.911765	0.955706	0.481344
LY	LY	0.597458	0.53787	0.58593	0.846264	0.964883	0.26903
KSP	KSP	0.602559	0.582286	0.429621	0.866342	0.968435	0.297347
SZJ	SZJ	0.605283	0.0447526	0.590122	0.824728	0.96682	0.387959
LAP	LAP	0.60737	0.0630828	0.34146	0.895648	0.967672	0.448845
PZX	PZX	0.607612	0.0433538	0.130883	0.817777	0.962371	0.41138
LRS	LRS	0.610439	0.0533244	0.292767	0.770961	0.946794	0.458619
SXJ	SXJ	0.611174	0.525673	0.118054		0.952968	0.466378
ZZY	ZZY	0.611582	0.537609	0.49436	0.821747	0.949247	0.287271
CYR	CYR	0.612023	0.969217	0.156509	0.769955	0.953579	0.476924
PW	PW	0.612126	0.0480719	0.135648	0.885496	0.970363	0.348707
WFY	WFY	0.612868	0.0956757	0.257948	0.809083	0.955219	0.47147
PXM	PXM	0.616891	0.0505191	0.18993	0.913793	0.963195	0.468789
CJL	CJL	0.62009	0.533562	0.422355	0.928571	0.949926	0.455759
WMY	WMY	0.62017	0.524676	0.342884	0.841117	0.963656	0.306328
ZSF	ZSF	0.620434	0.0344238	0.539283	0.730769	0.970565	0.407403
WFS	WFS	0.621923	0.0461538	0.594204	0.883705	0.970166	0.424036
ZGM	ZGM	0.632973	0.0552107	0.36189	0.857918	0.962441	0.348204
LFQ	LFQ	0.636731	0.519417	0.607714	0.908025	0.966603	0.332055
WDL	WDL	0.637502	0.552484	0.525562	0.865046	0.964137	0.369042
BSH	BSH	0.637988	0.506449	0.548969		0.960451	0.385061
ZHOUH	ZHOUH	0.638432	0.0499016	0.359037	0.756494	0.971426	0.395586
ZJN	ZJN	0.641573	0.56233	0.52412	0.861111	0.961398	0.366376
ZXN	ZXN	0.643324	0.52907	0.615899	0.868431	0.968463	0.395338
CHENY	CHENY	0.645945	0.0720298	0.129233	0.84375	0.959261	0.281775
LYX	LYX	0.646312	0.971587	0.303422	0.590909	0.929272	0.450043
LQD	LQD	0.651503	0.540254	0.605274	0.73913	0.971282	0.518623
ZQX	ZQX	0.656387	0.057902	0.52142	0.872093	0.962768	0.416995
YFY	YFY	0.657262	0.502676	0.380226	0.909091	0.964758	0.262231
LUOYF	LUOYF	0.658938	0.972278	0.260518	0.841667	0.934733	0.486
CZH	CZH	0.665146	0.532756	0.624359	0.879852	0.968845	0.433335
LWZ	LWZ	0.666558	0.558366	0.358786	0.866666	0.96642	0.505876
HXH	HXH	0.666725	0.531869	0.14497	0.84022	0.959076	0.262174
QS	QS	0.667404	0.0766257	0.516359	0.869881	0.968517	0.46382
ZWE	ZWE	0.672023	0.0380287	0.389445	0.858333	0.963988	0.463154
LJX	LJX	0.683778	0.0607696	0.328055		0.96521	0.339735
XLH	XLH	0.691941	0.528877	0.594733	0.909836	0.97268	0.413768
LWD	LWD	0.697408	0.569204	0.566202	0.844347	0.966638	0.477994
QHP	QHP	0.725806	0.0510204	0.368179	0.755319	0.971014	0.393939
FKW	FKW	0.740294	0.543661	0.303902	0.742021	0.952672	0.294288
CDA	CDA	0.757763	0.969429	0.515561	0.814815	0.938688	0.329327
JZM	JZM	0.764364	0.468927	0.494634	0.786224	0.935806	0.463674
CDP	CDP	0.782014	0.569362	0.613009	0.884826	0.959097	0.400216
XBP	XBP	0.783792	0.0834761	0.417449	0.860294	0.959246	0.4489
CZQ	CZQ	0.784968	0.522373	0.112168	0.808226	0.96104	0.408921
LZS	LZS	0.796795	0.522036	0.528822	0.861111	0.960583	0.349534
CWL	CWL	0.811589	0.0500533	0.623625	0.886907	0.96869	0.332093
TXL	TXL	0.817016	0.55361	0.449443	0.934783	0.958898	0.416302
YSK	YSK	0.817864	0.0473888	0.549159	0.867725	0.967879	0.306527
OYYL	OYYL	0.822059	0.0411118	0.130403	0.834036	0.958949	0.423701
LMY	LMY	0.825011	0.535955	0.364566	0.794118	0.964879	0.434277
CGF	CGF	0.828118	0.0600748	0.143391	0.884615	0.965804	0.354129
WHL	WHL	0.830462	0.524886	0.384331	0.869055	0.967831	0.315271
DTX	DTX	0.836977	0.509636	0.325335	0.906484	0.971619	0.243904
WENXM	WENXM	0.840872	0.51382	0.645432	0.924273	0.972181	0.411072
XQ	XQ		0.454545	0.546944	0.791667	1
[truncated: 198 more columns]

## Sheet: Sheet4
	Gene	cg02550950	cg03329597	cg13557709	cg14260773	cg18843803	cg25290307
JDS	JDS	1	0	0	0.76087	0.923296	1
PT	PT	0	2	1	0.833333	0.926667	1
LYX	LYX	1	2	0	0.590909	0.929272	1
QFL	QFL	1	0	0	0.7	0.931963	1
LUOYF	LUOYF	1	2	0	0.841667	0.934733	1
XGH	XGH	1	2	0	0.712108	0.935385	1
JZM	JZM	2	1	1	0.786224	0.935806	1
LIQD	LIQD	1	1	1	0.687464	0.938582	1
CDA	CDA	2	2	1	0.814815	0.938688	0
ZLN	ZLN	1	1	1	0.75	0.938727	1
ZWG	ZWG	1	1	0	0.88	0.944868	1
ZSE	ZSE	1	0	1	0.789474	0.945125	1
HWP	HWP	1	1	0	0.885135	0.946723	1
LRS	LRS	1	0	0	0.770961	0.946794	1
CGS	CGS	1	0	1	0.747486	0.946999	1
ZCZ	ZCZ	1	1	0	0.80337	0.948131	0
ZYE	ZYE	0	1	0	0.730855	0.948919	1
ZZY	ZZY	1	1	1	0.821747	0.949247	0
LRR	LRR	1	0	1	0.793621	0.949376	1
HLS	HLS	1	1	1	0.76716	0.949745	0
CJL	CJL	1	1	1	0.928571	0.949926	1
CXR	CXR	1	1	1	0.734966	0.950274	1
TML	TML	1	0	1	0.75266	0.950849	0
WANGJ	WANGJ	1	0	0	0.892405	0.951026	0
YZR	YZR	0	1	1	0.884615	0.95204	0
WUXW	WUXW	0	0	0	0.790323	0.952573	1
FKW	FKW	2	1	0	0.742021	0.952672	0
SXJ	SXJ	1	1	0		0.952968	1
LJS	LJS	0	0	1	0.8125	0.953222	1
LZC	LZC	0	2	1	0.823529	0.953232	1
WSD	WSD	1	1	1	0.719478	0.953424	1
LX	LX	1	0	1	0.954545	0.953515	1
CYR	CYR	1	2	0	0.769955	0.953579	1
WSF	WSF	1	1	0	0.747808	0.953626	1
AZZ	AZZ	1	0	1	0.752975	0.953976	1
HYH	HYH	1	0	0	0.776099	0.954917	1
WSQ	WSQ	0	0	1	0.785353	0.955071	1
WFY	WFY	1	0	0	0.809083	0.955219	1
QQB	QQB	1	1	1	0.909091	0.955676	1
YZX	YZX	1	0	1	0.911765	0.955706	1
WJ	WJ	1	2	1	0.758478	0.955798	1
WJE	WJE	0	1	0	0.737179	0.956611	0
HJB	HJB	0	0	1	0.805833	0.95663	0
XHB	XHB	1	0	0	0.802159	0.956653	1
LXM	LXM	1	0	1	0.958333	0.956994	1
PJM	PJM	1	1	1	0.81969	0.95713	0
XYE	XYE	1	0	0	0.832324	0.957155	1
ZJC	ZJC	1	0	0	0.805432	0.957298	1
YUANXH	YUANXH	0	1	1	0.857143	0.958127	0
ZMS	ZMS	1	0	1	0.875	0.958481	1
ZLM	ZLM	0	1	1	0.823622	0.958637	0
ZHC	ZHC	1	1	1	0.875	0.958764	1
TXL	TXL	2	1	1	0.934783	0.958898	1
OYYL	OYYL	2	0	0	0.834036	0.958949	1
ZCQ	ZCQ	1	0	0	0.793656	0.959071	1
QZX	QZX	1	1	1	0.874749	0.959074	1
HXH	HXH	2	1	0	0.84022	0.959076	0
SZY	SZY	1	0	1	0.785714	0.959079	0
CDP	CDP	2	1	1	0.884826	0.959097	1
YYP	YYP	0	1	1	0.839194	0.959116	0
XBP	XBP	2	0	1	0.860294	0.959246	1
ZGL	ZGL	1	0	1	0.869565	0.95925	1
CHENY	CHENY	1	0	0	0.84375	0.959261	0
DZX	DZX	0	0	0	0.811777	0.959649	1
JBS	JBS	1	0	1	0.896647	0.959795	1
PQY	PQY	1	2	1	0.892857	0.959824	1
HUANGXH	HUANGXH	0	0	1	0.95628	0.959834	1
WXM	WXM	1	0	0	0.82516	0.959863	0
LYY	LYY	1	1	0	0.87428	0.959917	1
JYL	JYL	1	2	1	0.807692	0.960247	1
ZQY	ZQY	1	0	1	0.792362	0.960316	0
GZ	GZ	0	1	1	0.797872	0.960428	1
BSH	BSH	1	1	1		0.960451	1
FMH	FMH	1	1	0	0.824324	0.96049	1
LZS	LZS	2	1	1	0.861111	0.960583	1
WLJ	WLJ	1	1	1	0.863636	0.960943	1
CZQ	CZQ	2	1	0	0.808226	0.96104	1
CYA	CYA	1	0	0	0.863636	0.961045	1
LGH	LGH	1	2	1		0.961074	1
LXZ	LXZ	0	1	1	0.851892	0.961293	1
ZJN	ZJN	1	1	1	0.861111	0.961398	1
ZMX	ZMX	0	2	1	0.834269	0.961489	0
SLG	SLG	1	0	1	0.861918	0.961492	0
HYA	HYA	1	0	1	0.841417	0.96157	1
LWN	LWN	1	2	1	0.958333	0.961646	1
CSY	CSY	1	1	0	0.84651	0.961712	1
LJ	LJ	1	0	1	1	0.962039	1
XMX	XMX	1	1	1	0.878049	0.962115	1
CBP	CBP	1	2	1	0.916667	0.962127	1
LM	LM	1	1	1	0.822704	0.962129	1
XBH	XBH	1	2	1	0.889305	0.962143	1
LQL	LQL	1	1	1	0.851516	0.962223	0
PZX	PZX	1	0	0	0.817777	0.962371	1
ZGM	ZGM	1	0	1	0.857918	0.962441	1
WXC	WXC	1	1	1	0.873939	0.962609	0
XX	XX	0	0	1	0.931818	0.962647	1
DZW	DZW	1	0	1	0.820063	0.962657	1
ZQX	ZQX	1	0	1	0.872093	0.962768	1
LHQ	LHQ	1	1	1	0.666667	0.962935	0
PXM	PXM	1	0	0	0.913793	0.963195	1
RGP	RGP	1	2	1	0.83459	0.96334	1
HL	HL	1	0	1	0.769231	0.963366	1
YHP	YHP	1	0	0	0.861111	0.963379	1
JYJ	JYJ	0	0	0	0.85	0.9634	1
WXW	WXW	1	0	1	0.858298	0.9635	1
WMY	WMY	1	1	1	0.841117	0.963656	0
WLY	WLY	1	0	0	0.877092	0.963669	1
TSY	TSY	1	0	1	0.837222	0.963862	0
SDX	SDX	0	1	1	0.872807	0.963877	1
LHR	LHR	0	0	1	0.844097	0.96389	1
LWP	LWP	1	1	0	0.865945	0.963916	1
ZWE	ZWE	2	0	1	0.858333	0.963988	1
LAL	LAL	0	1	0	0.826923	0.964136	0
WDL	WDL	1	1	1	0.865046	0.964137	1
YZW	YZW	1	1	1		0.964497	1
LCX	LCX	1	2	1	0.877072	0.964653	0
THW	THW	1	0	1	0.852896	0.964728	1
HYN	HYN	1	0	1	0.847826	0.964729	1
ZY	ZY	1	1	0	0.857143	0.964742	0
ZPJ	ZPJ	1	0	1	0.775	0.964751	1
YFY	YFY	1	1	1	0.909091	0.964758	0
GJ	GJ	1	0	1		0.964807	1
LMY	LMY	2	1	1	0.794118	0.964879	1
LY	LY	1	1	1	0.846264	0.964883	0
DYQ	DYQ	1	1	1	0.861111	0.964927	1
LSJ	LSJ	1	0	0	0.903846	0.964946	1
PJC	PJC	0	0	1	0.870415	0.965034	0
XGW	XGW	1	1	0	0.864714	0.965055	0
LH	LH	0	1	1	0.893428	0.965068	1
ZJY	ZJY	1	0	1	0.87094	0.96513	0
LJX	LJX	2	0	0		0.96521	1
ZKH	ZKH	1	1	1	0.862876	0.965222	1
LIXY	LIXY	1	0	1	0.751519	0.96538	1
HQL	HQL	1	2	1	0.948718	0.96547	1
LGJ	LGJ	1	0	1	0.875	0.965645	1
CXZ	CXZ	1	0	1	0.869575	0.965695	0
LZE	LZE	1	1	1	0.861064	0.965759	1
LCJ	LCJ	1	2	1	0.857209	0.965769	1
CGF	CGF	2	0	0	0.884615	0.965804	1
LYF	LYF	0	0	1	0.8652	0.965809	1
XXJ	XXJ	0	0	1	0.861111	0.965871	1
SCY	SCY	0	0	1	0.75	0.965915	1
WHB	WHB	1	1	0	0.892489	0.965944	0
PDZ	PDZ	1	0	1	0.858033	0.965969	1
LJL	LJL	1	1	1	0.888889	0.965987	1
ZXJ	ZXJ	0	1	1	0.868421	0.966261	1
LJJ	LJJ	1	1	1	0.833333	0.966376	1
LWZ	LWZ	2	1	1	0.866666	0.96642	1
LCF	LCF	1	0	1	0.847826	0.966437	1
LYE	LYE	1	0	1	0.862327	0.966529	1
XSN	XSN	1	2	1	0.868421	0.966544	1
GYQ	GYQ	1	1	1	0.879247	0.96657	1
LFQ	LFQ	1	1	1	0.908025	0.966603	0
LWD	LWD	2	1	1	0.844347	0.966638	1
YYT	YYT	1	0	1	0.830108	0.96668	0
LXP	LXP	1	2	1	0.860008	0.966726	1
SZJ	SZJ	1	0	1	0.824728	0.96682	1
YXH	YXH	0	1	1	0.901321	0.966987	0
DXG	DXG	1	0	1	0.88349	0.967062	1
ZHS	ZHS	1	0	1	0.838176	0.967095	0
MLH	MLH	1	1	1	0.791667	0.967098	0
LCB	LCB	1	1	1	0.826923	0.967112	1
LIXZ	LIXZ	1	0	1	0.96	0.967297	1
TLB	TLB	1	0	1	0.878505	0.96745	1
ZXM	ZXM	1	0	1	0.886534	0.967586	1
LAP	LAP	1	0	1	0.895648	0.967672	1
SCB	SCB	0	0	1	0.816092	0.967792	1
WHL	WHL	2	1	1	0.869055	0.967831	0
WZZ	WZZ	1	0	0	0.849754	0.967866	0
YSK	YSK	2	0	1	0.867725	0.967879	0
TCM	TCM	1	0	1	0.8125	0.96788	1
HF	HF	0	0	1	0.865535	0.968109	0
ZZH	ZZH	1	0	1	0.90091	0.968242	0
CY	CY	1	1	0	0.877515	0.968392	1
YDP	YDP	1	0	1	0.746212	0.968432	0
KSP	KSP	1	1	1	0.866342	0.968435	0
ZXN	ZXN	1	1	1	0.868431	0.968463	1
QS	QS	2	0	1	0.869881	0.968517	1
TP	TP	1	0	0	0.870242	0.968559	0
CWL	CWL	2	0	1	0.886907	0.96869	0
ZN	ZN	1	0	1	0.889216	0.968793	1
CZH	CZH	1	1	1	0.879852	0.968845	1
XHJ	XHJ	1	0	1	0.905552	0.968867	1
LZH	LZH	0	0	1	0.872354	0.968877	1
SY	SY	0	0	0	0.853267	0.969071	1
HXQ	HXQ	0	0	1	0.890621	0.969246	0
CLA	CLA	0	0	1	0.75	0.969357	0
GTY	GTY	0	0	1		0.969382	1
ZHUSE	ZHUSE	0	1	1		0.969489	1
XHF	XHF	1	1	1	0.707317	0.969538	1
TAH	TAH	1	2	1	0.867424	0.969559	0
ZLZ	ZLZ	1	1	1	0.884426	0.969614	1
LQY	LQY	1	0	0	0.892459	0.969859	1
LWJ	LWJ	0	0	1	0.858146	0.969897	1
SHH	SHH	1	1	0	0.887244	0.969925	0
ZSX	ZSX	1	0	1	0.905197	0.970112	1
WFS	WFS	1	0	1	0.883705	0.970166	1
XUHJ	XUHJ	1	1	1	0.857143	0.970273	1
LXN	LXN	1	0	1	0.897152	0.970351	0
PW	PW	1	0	0	0.885496	0.970363	1
ZSF	ZSF	1	0	1	0.730769	0.970565	1
ZYF	ZYF	1	0	1	0.821429	0.970703	1
FW	FW	1	1	1	0.771739	0.970815	0
QHP	QHP	2	0	1	0.755319	0.971014	1
LQD	LQD	1	1	1	0.73913	0.971282	1
ZHOUH	ZHOUH	1	0	1	0.756494	0.971426	1
SYF	SYF	0	1	1	0.892332	0.971529	1
DTX	DTX	2	1	0	0.906484	0.971619	0
LYC	LYC	1	1	1	0.9375	0.971711	0
LXY	LXY	0	0	1	0.84272	0.972045	0
LLH	LLH	1	0	0	0.933794	0.972091	1
WENXM	WENXM	2	1	1	0.924273	0.972181	1
WWD	WWD	1	0	1	0.885481	0.972416	1
XLH	XLH	2	1	1	0.909836	0.97268	1
FDZ	FDZ	1	0	1	0.766667	0.973029	1
ZAD	ZAD	1	0	1	0.851852	0.97308	1
ZJL	ZJL	1	0	1	0.75	0.973125	1
LW	LW	0	0	1	0.783582	0.973329	1
ZZ	ZZ	1	0	1	0.858108	0.974069	0
JXW	JXW	1	0	1	0.88232	0.974635	1
XWL	XWL	1	1	1	0.923804	0.974743	1
PD	PD	1	0	1		0.974921	1
HW	HW	0	0	1	0.903288	0.976	0
LZJ	LZJ	0	2	1	0.920478	0.977217	0
WB	WB	0	0	1	0.941176	0.997043	1
XQ	XQ	0	1	1	0.791667	1	1
